# Supplementary material for: Evaluating Probability Distribution Functions for the Standardized Precipitation Evapotranspiration Index over Ethiopia
Source: MDPI journal article supplement (doi:10.3390/atmos13030364), 2022-02-22
Supplement: s1 [file s1]

## Supplementary material

**Table S1:** The historical droughts and drought-hit regions in Ethiopia. It is obtained from the Emergency Events Database (EM-DAT) accessed last time in June 6, 2021 (<https://www.emdat.be/>).

| Location                                                                                                   | Drought onset year | Drought end year |
|------------------------------------------------------------------------------------------------------------|--------------------|------------------|
| Wollo, Gondor, Tigray, Shoa, Harerge, Sidamo                                                               | 1983               | 1984             |
| Ogaden, Tigray, Wollo, Shewa, Gofa, Sidamo, Gondor and Bale                                                | 1987               | 1987             |
| North Ethiopia, Tigray, Wollo, Gondar and Harerge                                                          | 1989               | 1994             |
| Borena, Bale, South Omo and Somali state                                                                   | 1997               | 1997             |
| North Wollo, South Wollo, Oromia, Wag Himira district, Tigray, Beneshangul Gumuz, Gambela and Somali state | 1999               | 2000             |
| Tigray, Oromia, Amhara, Somali and Afar states                                                             | 2003               | 2004             |
| Liben districts, Gode zone and Borena district                                                             | 2005               | 2006             |
| Oromia, Somali, Amhara, Afar, Tigray and South nation and nationalities provinces                          | 2008               | 2009             |
| Somali, Oromia, Afar, Tigray, Amhara, South nation and nationalities and Gambela province                  | 2009               | 2010             |
| Somali, Oromia, Afar, Tigray and Amhara provinces                                                          | 2011               | 2012             |
| Dire Dawa, Gambela, Hareri, Oromia, Somali and South nation and nationalities provinces                    | 2012               | 2012             |

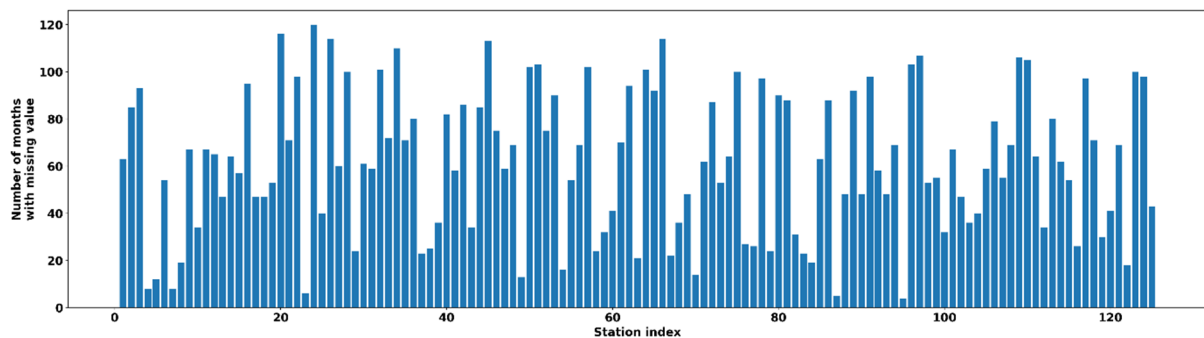

**Figure S1:** The number of months with missing precipitation data for all 125 gauging stations that are analyzed. The maximum number of months with missing precipitation data is limited to 10 years; otherwise, a given gauging station is not considered in the analysis.

**Table S2:** SPEI values and the corresponding severity groups

| SPEI value    | Drought category |
|---------------|------------------|
| 2+            | extremely wet    |
| 1.5 to 1.99   | very wet         |
| 1 to 1.49     | moderately wet   |
| -0.99 to 0.99 | near normal      |
| -1 to -1.49   | moderately dry   |
| -1.5 to -1.99 | severely dry     |
| -2 or less    | extremely dry    |

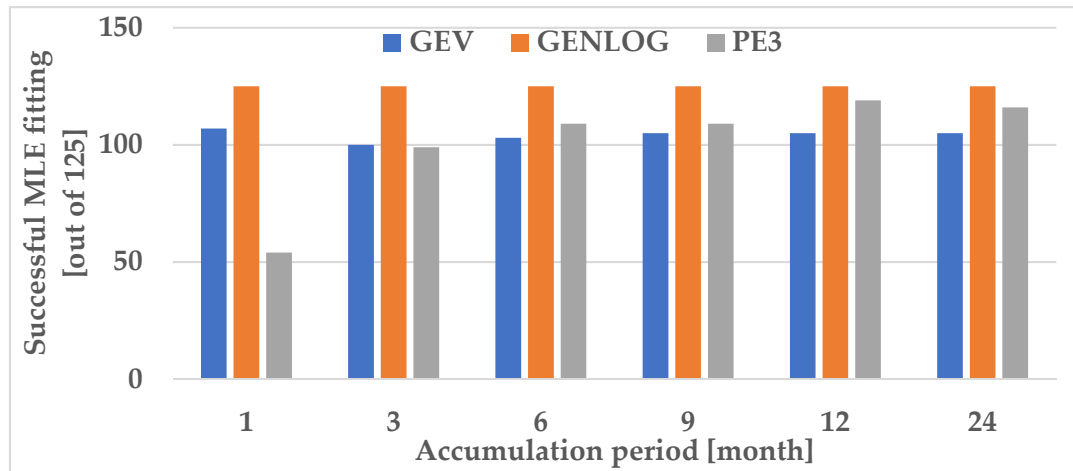

**Figure S2:** The number of successful fittings (out of 125) using maximum likelihood estimation (MLE) for each distribution for each accumulation period. This is estimated for above 30 years of data.

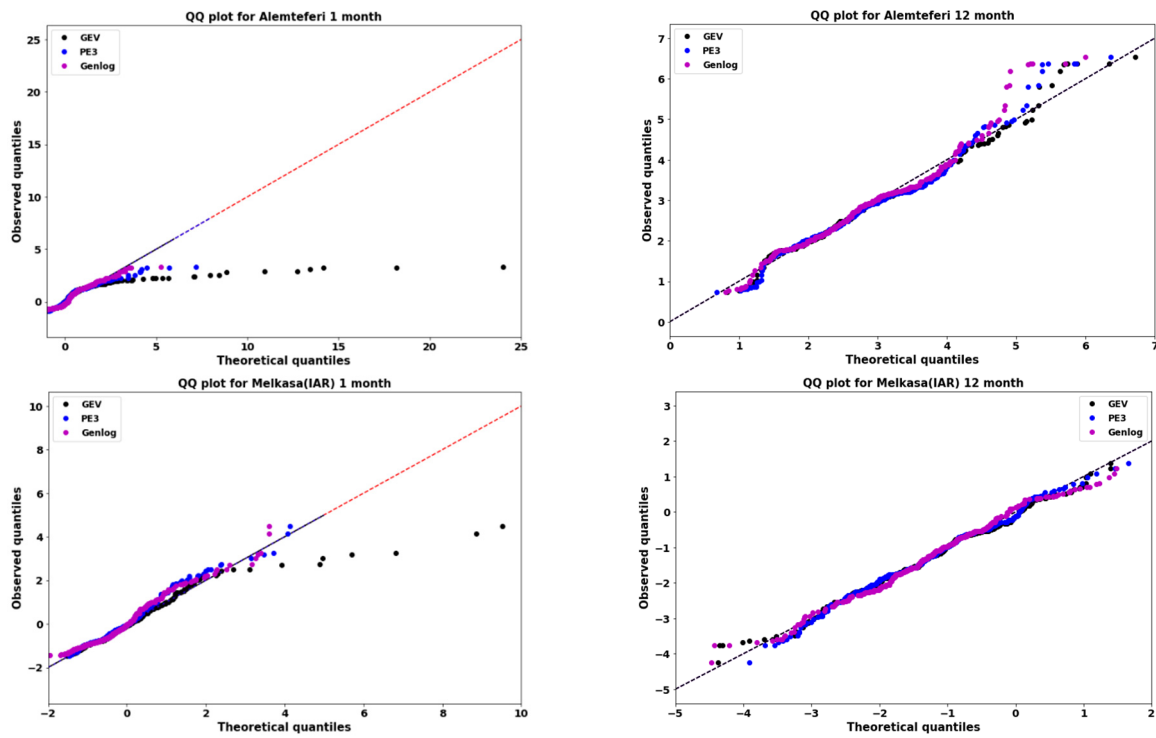

**Figure S3:** QQ plot for two gauging stations (Alemteferi and Melkasa (IAR)) water balance values fitted with Genlog, GEV, and PE3 for 1 and 12-month accumulation periods.

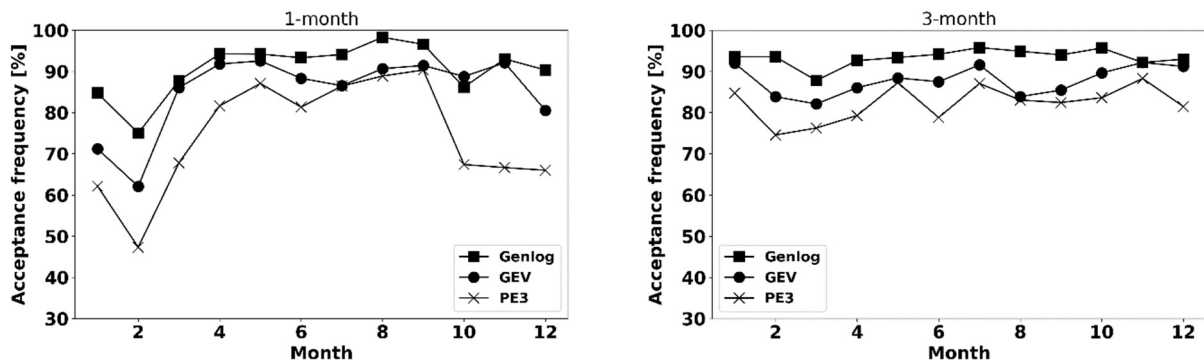

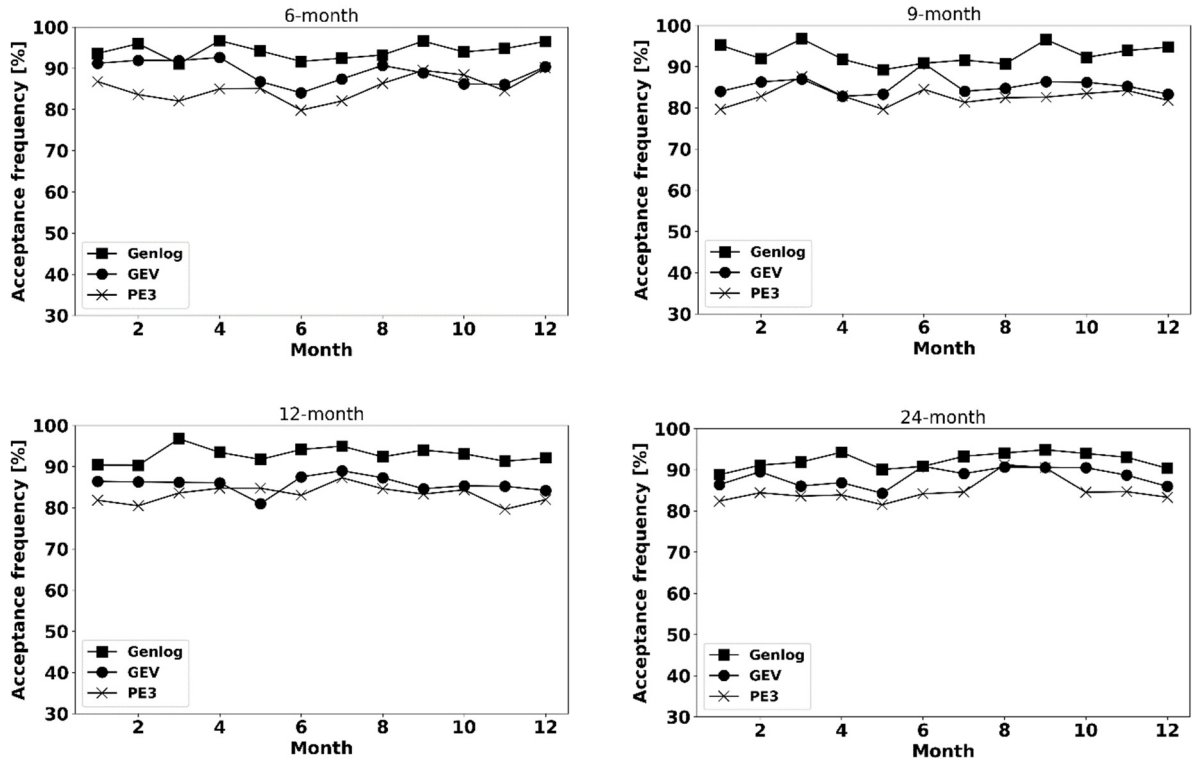

Figure S4: The acceptance frequency per month for each aggregation level and distribution function.

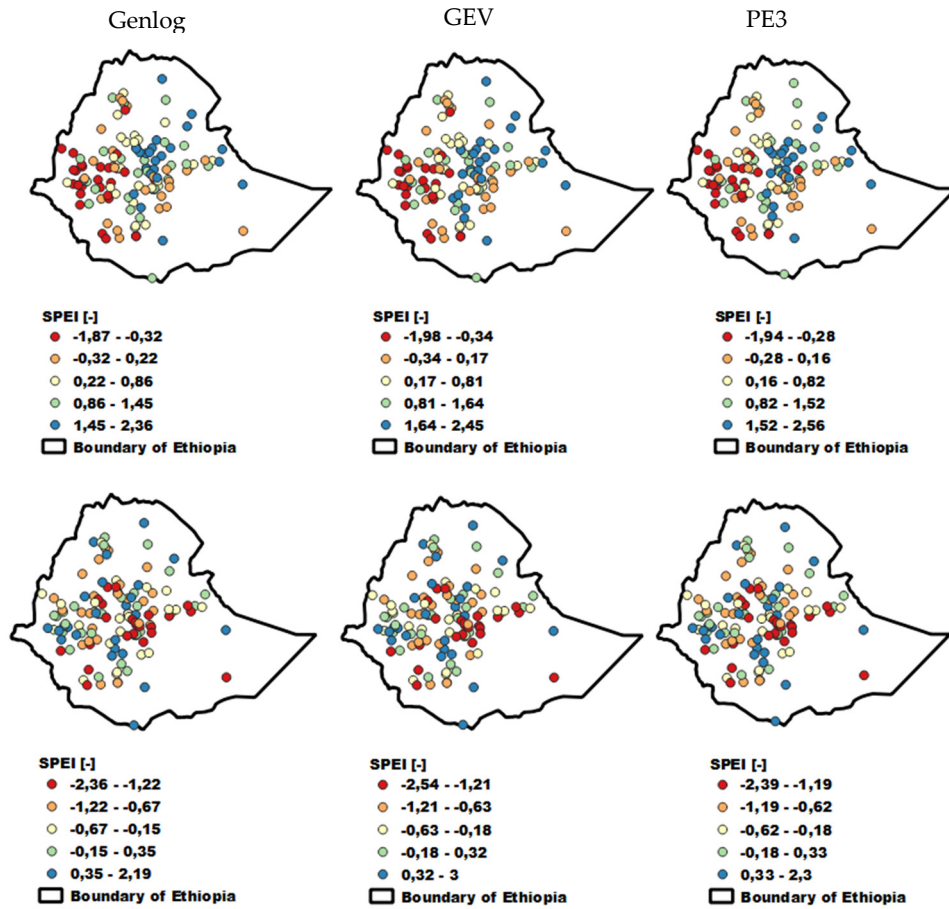

**Figure S5:** The SPEI values estimated from the three distribution functions for drought event in 1987-06 (top three plots) and 1988-05 (bottom 3 plots) for 24-month aggregation level.
