# Supplementary material for: Evaluating Probability Distribution Functions for the Standardized Precipitation Evapotranspiration Index over Ethiopia
Source: MDPI journal article supplement (doi:10.3390/atmos13030364), 2022-02-22
Supplement: s1 [file s1]

Archive with 1 entries (1 files):
- atmosphere-1548790-supplementary.pdf
